# Supplementary material for: Core Microbiota and Metabolome of Vitis vinifera L. cv. Corvina Grapes and Musts
Source: Front Microbiol. 2017 Mar 21;8:457. doi: 10.3389/fmicb.2017.00457 (PMC5359246; doi:10.3389/fmicb.2017.00457)
Supplement: Supplementary file 3 [file Table3.XLSX]

## Sheet: Sheet1
compound	grapes/musts	wilcox_p_value	fdr_pvalue
1,3-CYCLOPENTANEDIONE, 2,4-DIMETHYL-	0.461733	7.9384e-06	0.00577915
2-(3-METHYLPHENYL)PROPAN-2-OL	0.383357	7.9384e-06	0.00577915
Hydroperoxide, heptyl	0.0602688	7.9384e-06	0.00577915
Phenol, 2,6-dimethoxy-4-(2-propenyl)-	0.280805	7.9384e-06	0.00577915
1,3-Dioxolane, 4,5-dimethyl-2-pentadecyl-	0.507814	1.58768e-05	0.0114948
ETHANOL, 2-BUTOXY-, ACETATE	0.55753	1.58768e-05	0.0114948
Methyl m-tolyl carbinol	0.629625	1.58768e-05	0.0114948
2,4-Dimethoxy-3-methylpropiophenone	0.716678	3.17536e-05	0.0228943
BENZENEMETHANOL, 4-(1-METHYLETHYL)-	0.512687	3.17536e-05	0.0228943
.DELTA.-TERPINEOL √°EPOXIDE (√†,ALPHA.-DIMETHYL-3-CYCLOHEXENE-1-METHANOL 4-√°EPOXIDE)	0.305352	3.17536e-05	0.0228943
2(3H)-Furanone, 5-ethenyldihydro-5-methyl-	0.653726	5.55688e-05	0.0398984
1,1-BIPHENYL, 2,2-DIMETHYL-	1.64954	7.9384e-06	0.00577915
1,1-Biphenyl, 3,4-dimethyl-	1.6914	7.9384e-06	0.00577915
1,1-Biphenyl, 4-methyl-	1.69008	7.9384e-06	0.00577915
11-Methyldodecanol	1.78084	7.9384e-06	0.00577915
1,3,5-TRIOXANE, 2,4,6-TRIMETHYL-	2.49214	7.9384e-06	0.00577915
1,5,6,7-Tetramethyl-3-phenylbicyclo[3.2.0]hepta-2,6-diene	1.78601	7.9384e-06	0.00577915
1,5-PENT-2-ENE-3-METHYL-5-(2,6-DIMETHYLHEPTHYL)OLIDE	2.47176	7.9384e-06	0.00577915
1,6-Dioxacyclododecane-7,12-dione	2.99093	7.9384e-06	0.00577915
1-BENZYL-3-METHYLBENZENE	1.68912	7.9384e-06	0.00577915
1-HEXADECANOL	2.24188	7.9384e-06	0.00577915
1-HEXADECANOL, ACETATE	1.56784	7.9384e-06	0.00577915
1-HEXANOL, 2-ETHYL-	1.50981	7.9384e-06	0.00577915
1H-INDENE, 2,3-DIHYDRO-4,5,7-TRIMETHYL-	1.70842	7.9384e-06	0.00577915
1-Pyrrolidinecarboxaldehyde	1.73928	7.9384e-06	0.00577915
1-TRIDECANOL	1.83888	7.9384e-06	0.00577915
1-UNDECANOL	1.51816	7.9384e-06	0.00577915
(1Z)-1,2,3-TRICHLORO-1-PROPENE	1.57951	7.9384e-06	0.00577915
(2-(2-BUTOXYISOPROPOXY)-2-ISOPROPANOL	2.17931	7.9384e-06	0.00577915
2,4-HEPTADIENAL, (E,E)-	1.79301	7.9384e-06	0.00577915
2,5-HEXANEDIONE	1.81476	7.9384e-06	0.00577915
2(5H)-Furanone, 5-ethyl-	2.08988	7.9384e-06	0.00577915
2,6-Diisopropylnaphthalene	1.82615	7.9384e-06	0.00577915
2,6-Nonadienal, (E,Z)-	1.83331	7.9384e-06	0.00577915
2-BUTANONE, 4-(4-HYDROXY-3-METHOXYPHENYL)-	1.58912	7.9384e-06	0.00577915
2-ETHYLHEXYL (2E)-3-(4-METHOXYPHENYL)-2-PROPENOATE	3.03489	7.9384e-06	0.00577915
2-Furanol, tetrahydro-	3.40501	7.9384e-06	0.00577915
2-Heptenal, (Z)-	2.2531	7.9384e-06	0.00577915
2H-Indol-2-one, 1,3-dihydro-	2.05934	7.9384e-06	0.00577915
2H-Pyran-2-one, 5,6-dihydro-	2.12926	7.9384e-06	0.00577915
2H-Pyran, 4-chlorotetrahydro-	1.64713	7.9384e-06	0.00577915
2-METHYL-3-BUTEN-1,2-DIOL	1.8554	7.9384e-06	0.00577915
2-Piperidinone	1.70413	7.9384e-06	0.00577915
2-Propanol, 1-(2-methoxy-1-methylethoxy)-	3.30124	7.9384e-06	0.00577915
2-Propenal, 3-(4-hydroxy-3-methoxyphenyl)-	2.28585	7.9384e-06	0.00577915
3,5-di-tert-Butyl-4-hydroxybenzaldehyde	2.02877	7.9384e-06	0.00577915
3-BUTEN-2-ONE, 4-[4-(ACETYLOXY)-2,2,6-TRIMETHYL-7-OXABICYCLO[4.1.0]HEPT-1-YL]-	1.97507	7.9384e-06	0.00577915
3-Hexen-2-one, 3-methyl-	1.4434	7.9384e-06	0.00577915
3-Pentanol	1.37114	7.9384e-06	0.00577915
4-Hepten-2-one, (E)-	2.39736	7.9384e-06	0.00577915
4H-PYRAN	2.10183	7.9384e-06	0.00577915
5-HEPTEN-2-ONE, 6-METHYL-	3.18103	7.9384e-06	0.00577915
5-OXO-TETRAHYDRO-FURAN-2-CARBOXYLIC ACID	1.67099	7.9384e-06	0.00577915
6-[(2-ETHYLHEXYL)OXY]-6-OXOHEXANOIC ACID	1.67492	7.9384e-06	0.00577915
6-NONENAL, (Z)-	1.88638	7.9384e-06	0.00577915
7,9-DITERT-BUTYL-1-OXASPIRO[4.5]DECA-6,9-DIENE-2,8-DIONE	1.55382	7.9384e-06	0.00577915
√†,√†,√†,√†-Tetramethyl-1,4-benzenedimethanol	1.73685	7.9384e-06	0.00577915
√†,√°-CROTONOLACTONE	1.35802	7.9384e-06	0.00577915
√†-Cadinol	2.89308	7.9384e-06	0.00577915
Analyte 1374	1.75509	7.9384e-06	0.00577915
Analyte 1659	1.7848	7.9384e-06	0.00577915
Analyte 1700	1.75242	7.9384e-06	0.00577915
Analyte 1767	1.79249	7.9384e-06	0.00577915
Analyte 1940	1.7757	7.9384e-06	0.00577915
Analyte 3038	1.77409	7.9384e-06	0.00577915
Benzaldehyde, 3-methoxy-4-(1-naphthalenylmethoxy)-	1.64121	7.9384e-06	0.00577915
Benzaldehyde, 4-hydroxy-	2.21663	7.9384e-06	0.00577915
BENZENE, 1,1-METHYLENEBIS-	1.70266	7.9384e-06	0.00577915
BENZENE, 1,1-OXYBIS-	1.62128	7.9384e-06	0.00577915
Benzene, 1,4-bis(1-methylethyl)-	1.87876	7.9384e-06	0.00577915
Benzene, 1-ethyl-3-(phenylmethyl)-	1.70715	7.9384e-06	0.00577915
BENZENEACETALDEHYDE	1.63169	7.9384e-06	0.00577915
Benzenepropanoic acid, 3,5-bis(1,1-dimethylethyl)-4-hydroxy-, methyl ester	1.64505	7.9384e-06	0.00577915
Benzothiazole	1.74789	7.9384e-06	0.00577915
Butyrolactone	1.94781	7.9384e-06	0.00577915
cis-4,5-Epoxy-(E)-2-decenal	2.21247	7.9384e-06	0.00577915
CYCLOHEPTANONE	1.7484	7.9384e-06	0.00577915
Cyclohexane, 1,1-(1,5-pentanediyl)bis-	1.99649	7.9384e-06	0.00577915
Cyclopentane, hexyl-	1.61786	7.9384e-06	0.00577915
DECANE	1.89677	7.9384e-06	0.00577915
Decane, 2,3,5,8-tetramethyl-	1.84679	7.9384e-06	0.00577915
DECANOIC ACID	1.72652	7.9384e-06	0.00577915
Decanoic acid, 2-ethylhexyl ester	3.29404	7.9384e-06	0.00577915
DIISOPROPYL TRISULFIDE	1.8415	7.9384e-06	0.00577915
DISULFIDE, BIS(1-METHYLETHYL)	1.75646	7.9384e-06	0.00577915
DOCOSANE	1.83488	7.9384e-06	0.00577915
EICOSANE	1.82209	7.9384e-06	0.00577915
ETHANOL, 2,2-[1,2-ETHANEDIYLBIS(OXY)]BIS-	1.75951	7.9384e-06	0.00577915
ETHANOL, 2-(2-BUTOXYETHOXY)-	3.42323	7.9384e-06	0.00577915
Ethanol, 2-(2-ethoxyethoxy)-	1.76748	7.9384e-06	0.00577915
Ethanol, 2-phenoxy-	2.65763	7.9384e-06	0.00577915
ETHANONE, 1,1-(1,4-PHENYLENE)BIS-	1.64969	7.9384e-06	0.00577915
HEPTADECANE	1.94105	7.9384e-06	0.00577915
HEXADECANAL	1.84009	7.9384e-06	0.00577915
HEXANAL	1.68319	7.9384e-06	0.00577915
HYDRAZINECARBOXAMIDE, N,N-DIPHENYL-	1.66241	7.9384e-06	0.00577915
ISOPROPYL TETRADECANOATE	1.93395	7.9384e-06	0.00577915
Naphthalene, 1,4,5-trimethyl-	1.8148	7.9384e-06	0.00577915
Naphthalene, 1,4,6-trimethyl-	1.69484	7.9384e-06	0.00577915
Naphthalene, 1-ethyl-	1.72359	7.9384e-06	0.00577915
NAPHTHALENE, 1-METHYL-	1.6934	7.9384e-06	0.00577915
NAPHTHALENE, 1-METHYL-7-(1-METHYLETHYL)-	1.63332	7.9384e-06	0.00577915
NAPHTHALENE, 2-(1-METHYLETHYL)-	1.69107	7.9384e-06	0.00577915
Naphthalene, 2,3-dimethyl-	1.69551	7.9384e-06	0.00577915
N,N-DIBUTYLFORMAMIDE	1.72766	7.9384e-06	0.00577915
NONANAL	1.75906	7.9384e-06	0.00577915
OCTADECANE	1.9417	7.9384e-06	0.00577915
OCTANOIC ACID	1.54097	7.9384e-06	0.00577915
PENTADECANE	1.89605	7.9384e-06	0.00577915
PENTADECANE, 5-METHYL-	1.85646	7.9384e-06	0.00577915
Phenanthrene	1.76528	7.9384e-06	0.00577915
PHENOL, 2-METHOXY-4-(2-PROPENYL)-	1.78241	7.9384e-06	0.00577915
Phenol, 2-methoxy-4-propyl-	3.69203	7.9384e-06	0.00577915
PHENOL, 3,4-DIMETHOXY-	2.46253	7.9384e-06	0.00577915
Propane, 1,2-dimethoxy-	3.17025	7.9384e-06	0.00577915
Propanoic acid, 2-methyl-, 2,2-dimethyl-1-(2-hydroxy-1-methylethyl)propyl ester	1.94271	7.9384e-06	0.00577915
Propanoic acid, 2-methyl-, 3-hydroxy-2,4,4-trimethylpentyl ester	1.63527	7.9384e-06	0.00577915
(S)-(+)-2-Pentanol	1.19389	7.9384e-06	0.00577915
TETRADECANE	1.79828	7.9384e-06	0.00577915
TRICOSANE	1.81422	7.9384e-06	0.00577915
TRIDECANE, 3-METHYL-	1.64057	7.9384e-06	0.00577915
UNDECANE	1.87058	7.9384e-06	0.00577915
1,1-BIPHENYL, 3,3-DIMETHYL-	1.69528	1.58768e-05	0.00979598
1,2-BENZENEDICARBOXYLIC ACID, DIMETHYL ESTER	1.50576	1.58768e-05	0.00979598
1,3-DITHIOLO[4,5-B]FURAN, TETRAHYDRO-3A-METHYL-	1.53001	1.58768e-05	0.00979598
1H-3A,7-METHANOAZULENE, 2,3,4,7,8,8A-HEXAHYDRO-3,6,8,8-TETRAMETHYL-, [3R-(3√†,3A√°,7√°,8A√†)]-	1.81258	1.58768e-05	0.00979598
2(4H)-Benzofuranone, 5,6,7,7a-tetrahydro-4,4,7a-trimethyl-	1.4406	1.58768e-05	0.00979598
2-Cyclohexen-1-one, 4-(3-hydroxy-1-butenyl)-3,5,5-trimethyl-, [R-[R*,R*-(E)]]-	1.75721	1.58768e-05	0.00979598
4-ACETYLBENZALDEHYDE	1.37247	1.58768e-05	0.00979598
9H-Fluorene, 3-methyl-	1.78452	1.58768e-05	0.00979598
Acetaldehyde, tetramer	2.58086	1.58768e-05	0.00979598
Analyte 1789	1.7304	1.58768e-05	0.00979598
Analyte 2106	1.79362	1.58768e-05	0.00979598
Analyte 3321	1.58171	1.58768e-05	0.00979598
Analyte 3403	1.71864	1.58768e-05	0.00979598
Analyte 3624	1.55196	1.58768e-05	0.00979598
Benzene, (1-ethyloctyl)-	1.85151	1.58768e-05	0.00979598
Benzene, 1-methyl-4-(phenylmethyl)-	1.77084	1.58768e-05	0.00979598
Benzene, 3,5-dimethyl-1-(phenylmethyl)-	1.5927	1.58768e-05	0.00979598
BENZENE, PENTYL-	2.16936	1.58768e-05	0.00979598
CYCLOHEXANE, (2-METHYLPROPYL)-	2.10076	1.58768e-05	0.00979598
DECANAL	1.84953	1.58768e-05	0.00979598
DODECANOIC ACID	1.5681	1.58768e-05	0.00979598
ETHANONE, 1-[4-(1-METHYLETHYL)PHENYL]-	1.85844	1.58768e-05	0.00979598
HENEICOSANE	1.85574	1.58768e-05	0.00979598
Heptadecyl acetate	1.68663	1.58768e-05	0.00979598
HEXADECANE	2.03746	1.58768e-05	0.00979598
HEXADECANOIC ACID, METHYL ESTER	1.52801	1.58768e-05	0.00979598
Naphthalene, 1,2,3-trimethyl-4-propenyl-, (E)-	1.71416	1.58768e-05	0.00979598
Naphthalene, 1,7-dimethyl-	1.69628	1.58768e-05	0.00979598
PHENOL	1.53895	1.58768e-05	0.00979598
Phenol, 2,4-bis(1,1-dimethylethyl)-	1.65115	1.58768e-05	0.00979598
1-HEXANOL	1.30919	3.17536e-05	0.0186394
1H-Indene, 2,3-dihydro-1,2-dimethyl-	1.71064	3.17536e-05	0.0186394
2,3-Dioxabicyclo[2.2.1]heptane, 1-methyl-	2.07305	3.17536e-05	0.0186394
2(3H)-FURANONE, DIHYDRO-5-PENTYL-	1.44291	3.17536e-05	0.0186394
BENZALDEHYDE, 4-HYDROXY-3-METHOXY-	1.46297	3.17536e-05	0.0186394
Benzene, 1,2-dimethyl-4-(phenylmethyl)-	1.91586	3.17536e-05	0.0186394
Benzene, (1-butylnonyl)-	1.74252	3.17536e-05	0.0186394
Benzene, (1-methylundecyl)-	1.7399	3.17536e-05	0.0186394
BENZENE, (1-PROPYLNONYL)-	1.77032	3.17536e-05	0.0186394
CYCLOPENTANE, DECYL-	1.68678	3.17536e-05	0.0186394
CYCLOTETRADECANE	1.68336	3.17536e-05	0.0186394
Decane, 5-methyl-6-methylene-	1.40848	3.17536e-05	0.0186394
DODECANE	1.67218	3.17536e-05	0.0186394
FORMIC ACID	1.47608	3.17536e-05	0.0186394
Heptanoic acid	1.46282	3.17536e-05	0.0186394
NONADECANE	2.0923	3.17536e-05	0.0186394
PYRAZINE, TRIMETHYL-	1.40941	3.17536e-05	0.0186394
1,3-CYCLOPENTADIENE, 1-ETHENYL-	1.6287	5.55688e-05	0.0316742
1-OCTEN-3-OL	2.26844	5.55688e-05	0.0316742
1-Octene, 3,7-dimethyl-	1.92093	5.55688e-05	0.0316742
Analyte 3979	1.53496	5.55688e-05	0.0316742
√†-Pinene	1.49654	5.55688e-05	0.0316742
BENZENEACETIC ACID, 4-HYDROXY-3-METHOXY-	2.92627	5.55688e-05	0.0316742
CYCLOHEXANE, DECYL-	2.01448	5.55688e-05	0.0316742
Decane, 3-methyl-	2.54059	5.55688e-05	0.0316742
DODECANOIC ACID, METHYL ESTER	1.40049	5.55688e-05	0.0316742
ETHANOL, 2-BUTOXY-	1.31629	5.55688e-05	0.0316742
ETHANONE, 1-(4-HYDROXYPHENYL)-	2.17284	5.55688e-05	0.0316742
Phenol, 3,4,5-trimethoxy-	1.62068	5.55688e-05	0.0316742
