# Supplementary material for: Core Microbiota and Metabolome of Vitis vinifera L. cv. Corvina Grapes and Musts
Source: Front Microbiol. 2017 Mar 21;8:457. doi: 10.3389/fmicb.2017.00457 (PMC5359246; doi:10.3389/fmicb.2017.00457)
Supplement: Supplementary file 6 [file Table6.XLSX]

## Sheet: table_legend
column name	description	note
compound name	name as indicated in the manuscript
alias	second commonly used name
2014/2015	median concentration in 2014 samples/ median concentration in 2015 samples
wilcox_lower	Wilcoxon-Mann-Whithney p-value
fdr_lower
wilcox_greater
fdr_greater
Fungal_genus_correlated	fungal genus whose abundance is correlated to the compound concentration in must samples of both 2014 and 2015 Corvina vintages	only for compounds correlating with fungal genera present in both studied vintages
Spearman r	Spearman correlation r calculated between the compound and the fungal genus
CAS	Compound CAS ID
CID	Compound CID (PubChem ID)
FoodDB	Compound FoodDB ID (http://foodb.ca/)
flavor	compound flavor as indicated in the FoodDB database
notes	further information on the compound

## Sheet: Sheet1
compound name	alias	2014/2015	wilcox_lower	fdr_lower	wilcox_greater	fdr_greater	Fungal_genus_correlated	spearman r (with FDR<0.05)	CAS	CID	FoodDB	flavor	notes
Benzaldehyde, 4-hydroxy-	P-Formilphenol	0.794312	0.18956	1	0.841758	0.962217	Candida	-0.76391	123-08-0	126	FDB010504	almond, balsam, nutty, sweet, woody	occurs naturally combined in many glycosides
METHANE, DICHLORO-		0.174141	0.475754	1	0.572381	0.666939	Candida	-0.75188	75-09-2	6344	FDB008159	sweet, pleasant smell	NA
1,3,5-TRIOXANE, 2,4,6-TRIMETHYL-	paraldehyde	0.964653	0.475754	1	0.572381	0.666939	Cytospora	-0.720476	1499-02-10	31264	FDB010010	aromatic, sweet	used as food additive
OCTADECANE		38.8165	0.956401	1	0.0561202	0.072108	Cytospora	-0.712778	593-45-3	11635	FDB011840	alkane	NA
OCTANOIC ACID	caprilic acid	0.393611	0.523626	1	0.523626	0.614027	Cytospora	-0.742028	124-07-2	379	FDB003336	cheesy, rancid, sweat, vegetable	widespread in plant oils and in fruits
TETRADECANE		1.74617	0.949323	1	0.064638	0.0827316	Cytospora	-0.788213	629-59-4	12389	FDB004731	alkane, mild, waxy	NA
1-PENTANOL	Amyl alcohol	0.941815	0.18956	1	0.841758	0.962217	Diplodia	0.723158	71-41-0	6276	FDB008230	balsamic, fusel, oil, sweet, vanilla	Widely distributed in plant sources, e.g. peppermint oil, tomatoes, tea, potatoes
3,6,9,12-TETRAOXATETRADECANE-1,14-DIOL	pentaglycol	1.78757	0.914835	1	0.106044	0.132156	Diplodia	-0.729682	4792-15-8	62551	NA	NA	NA
PHENOL, 2,6-DIMETHOXY-	Syringol	0.843853	0.523626	1	0.523626	0.614027	Diplodia	0.751768	91-10-1	7041	FDB012443	bacon, balsamic, phenol, powdery, smoke, woody	NA
3,6,9,12-TETRAOXATETRADECANE-1,14-DIOL	pentaglycol	1.78757	0.914835	1	0.106044	0.132156	Leptosphaerulina	0.714027	4792-15-8	62551	NA	NA	NA
(3E)-3-HEXENOIC ACID	(3E)-3-HEXENOIC ACID	49.1976	0.956401	1	0.0561202	0.072108	Metschnikowia	-0.732052	1577-18-0	5282708	FDB021772	acid, cheesy, fruity, grass, green, sweaty
1-BUTANOL, 3-METHYL-, ACETATE	isoamyl acetate	1.70037	0.914835	1	0.106044	0.132156	Metschnikowia	-0.752887	123-92-2	31276	FDB008132	banana and pear
1,2-BENZENEDICARBOXYLIC ACID, DIBUTYL ESTER	dibutyl phthalate	1.14971	0.427777	1	0.619205	0.720233	Metschnikowia	-0.857084	84-74-2	3026	FDB011261	faint	commonly used plasticizer, used as an additive to adhesive or printing inks
1,3,5-TRIOXANE, 2,4,6-TRIMETHYL-	paraldehyde	0.964653	0.475754	1	0.572381	0.666939	Metschnikowia	-0.704313	1499-02-10	31264	FDB010010	aromatic, sweet	used as food additive
4-(4-ACETYLPHENYL)-4-HYDROXY-2-METHYL-1-PENTENE		111.943	0.935785	1	0.0809515	0.102425	Metschnikowia	-0.785008	NA	NA	NA	NA	NA
Benzaldehyde, 4-hydroxy-	P-Formilphenol	0.794312	0.18956	1	0.841758	0.962217	Metschnikowia	-0.732517	123-08-0	126	FDB010504	almond, balsam, nutty, sweet, woody	occurs naturally combined in many glycosides
ETHANOL, 2,2-[1,2-ETHANEDIYLBIS(OXY)]BIS-	triethylene glycol	1.13306	0.70792	1	0.335166	0.405178	Metschnikowia	-0.853488	112-27-6	8172	NA	odorless	used as plasticizer for vinyl. When aerosolized acts as a disinfectant
METHANE, DICHLORO-		0.174141	0.475754	1	0.572381	0.666939	Metschnikowia	-0.773256	75-09-2	6344	FDB008159	sweet, pleasant smell	NA
OCTADECANE		38.8165	0.956401	1	0.0561202	0.072108	Metschnikowia	-0.786574	593-45-3	11635	FDB011840	alkane	NA
OCTANOIC ACID	caprilic acid	0.393611	0.523626	1	0.523626	0.614027	Metschnikowia	-0.84925	124-07-2	379	FDB003336	cheesy, rancid, sweat, vegetable	widespread in plant oils and in fruits
PHENOL, 4-FLUORO-		0.788951	0.341758	1	0.700549	0.813423	Metschnikowia	0.750536	371-41-5	9732	NA	NA	NA
TETRADECANE		1.74617	0.949323	1	0.064638	0.0827316	Metschnikowia	-0.848466	629-59-4	12389	FDB004731	alkane, mild, waxy	NA
(3-METHYL-2-OXIRANYL)METHANOL		0.784122	0.524192	1	0.524192	0.614027	NA	NA	NA	NA	NA	NA	NA
1-BUTANOL, 3-METHYL-		0.920282	0.476374	1	0.569231	0.665608	NA	NA	NA	NA	NA	NA	NA
1-PENTANOL, 3-METHYL-		0.704688	0.130769	1	0.893956	1	NA	NA	NA	NA	NA	NA	NA
1,2-HEPTANEDIOL		2.13246	0.935785	1	0.0809515	0.102425	NA	NA	NA	NA	NA	NA	NA
1H-ISOINDOLE-1,3(2H)-DIONE		1.31085	0.914835	1	0.106044	0.132156	NA	NA	NA	NA	NA	NA	NA
2-BUTANONE, 3-HYDROXY-		0.988128	0.569231	1	0.476374	0.56805	NA	NA	NA	NA	NA	NA	NA
2-FURANCARBOXALDEHYDE, 5-METHYL-		1.83206	0.948352	1	0.0664835	0.0847665	NA	NA	NA	NA	NA	NA	NA
2-FURANCARBOXYLIC ACID		0.692687	0.0851648	0.714738	0.933516	1	NA	NA	NA	NA	NA	NA	NA
2-Methoxy-4-vinylphenol		0.253307	0.130769	1	0.893956	1	NA	NA	NA	NA	NA	NA	NA
2,3-Butanediol, [S-(R*,R*)]-		0.782647	0.292496	1	0.747762	0.863704	NA	NA	NA	NA	NA	NA	NA
2H-PYRAN-2-ONE, TETRAHYDRO-4-HYDROXY-4-METHYL-		4.17886	0.956401	1	0.0561202	0.072108	NA	NA	NA	NA	NA	NA	NA
2H-Pyran-2,6(3H)-dione		1.33188	0.658242	1	0.385165	0.463456	NA	NA	NA	NA	NA	NA	NA
3,5-Dimethoxy-4-hydroxyphenethylamine		0.0530887	0.0851648	0.714738	0.933516	1	NA	NA	NA	NA	NA	NA	NA
4-(1-HYDROXY-ETHYL) √ß BUTANOLACTONE		1.53863	0.869231	1	0.158242	0.195371	NA	NA	NA	NA	NA	NA	NA
BENZENEACETALDEHYDE, √†-METHYL-		1.25526	0.970879	1	0.039011	0.0508139	NA	NA	NA	NA	NA	NA	NA
Benzeneacetic acid		0.864077	0.26044	1	0.776923	0.895826	NA	NA	NA	NA	NA	NA	NA
BENZENEACETIC ACID, ETHYL ESTER		0.719811	0.039011	0.364286	0.970879	1	NA	NA	NA	NA	NA	NA	NA
Benzeneethanol, 4-hydroxy-		0.594886	0.524192	1	0.524192	0.614027	NA	NA	NA	NA	NA	NA	NA
BENZENEMETHANOL		0.993701	0.523626	1	0.523626	0.614027	NA	NA	NA	NA	NA	NA	NA
BENZENEMETHANOL, √†,√†-DIMETHYL-		0.554861	0.18956	1	0.841758	0.962217	NA	NA	NA	NA	NA	NA	NA
BUTANEDIOIC ACID, DIETHYL ESTER		0.939419	0.299451	1	0.73956	0.855722	NA	NA	NA	NA	NA	NA	NA
CYCLOPENTANOL		1.05619	0.776923	1	0.26044	0.318582	NA	NA	NA	NA	NA	NA	NA
ETHANOL, 2-[2-(ETHENYLOXY)ETHOXY]-		4.22428	0.788172	1	0.249202	0.305399	NA	NA	NA	NA	NA	NA	NA
ETHANONE, 1-(4-HYDROXY-3,5-DIMETHOXYPHENYL)-		0.668802	0.0851648	0.714738	0.933516	1	NA	NA	NA	NA	NA	NA	NA
ETHYL 4-HYDROXYBUTANOATE		1.89874	0.73956	1	0.299451	0.364955	NA	NA	NA	NA	NA	NA	NA
Ethyl hydrogen succinate		0.482378	0.524192	1	0.524192	0.614027	NA	NA	NA	NA	NA	NA	NA
Furfural		0.697231	0.18956	1	0.841758	0.962217	NA	NA	NA	NA	NA	NA	NA
OXIRANEMETHANOL		1.02303	0.643007	1	0.403484	0.48462	NA	NA	NA	NA	NA	NA	NA
PHENOL, 2-METHOXY-		0.866235	0.18956	1	0.841758	0.962217	NA	NA	NA	NA	NA	NA	NA
Propanoic acid		1.27298	0.707504	1	0.33551	0.405178	NA	NA	NA	NA	NA	NA	NA
RS-2,3-hexanediol		0.988271	0.523626	1	0.523626	0.614027	NA	NA	NA	NA	NA	NA	NA
Tetraethylene glycol		0.921349	0.312535	1	0.72935	0.845383	NA	NA	NA	NA	NA	NA	NA
Tryptophol		1.83859	0.933516	1	0.0851648	0.106738	NA	NA	NA	NA	NA	NA	NA
(3E)-3-HEXENOIC ACID	(3E)-3-HEXENOIC ACID	67.251	0.956401	1	0.0561202	0.072108	Phoma	0.746599	1577-18-0	5282708	FDB021772	acid, cheesy, fruity, grass, green, sweaty
OCTADECANE		38.8165	0.956401	1	0.0561202	0.072108	Phoma	0.776857	593-45-3	11635	FDB011840	alkane	NA
4-(4-ACETYLPHENYL)-4-HYDROXY-2-METHYL-1-PENTENE		111.943	0.935785	1	0.0809515	0.102425	Pithomyces	0.729256	NA	NA	NA	NA	NA
OCTADECANE		38.8165	0.956401	1	0.0561202	0.072108	Pithomyces	0.76754	593-45-3	11635	FDB011840	alkane	NA
TETRADECANE		1.74617	0.949323	1	0.064638	0.0827316	Pithomyces	0.769951	629-59-4	12389	FDB004731	alkane, mild, waxy	NA
1-BUTANOL, 3-METHYL-, ACETATE	isoamyl acetate	1.70037	0.914835	1	0.106044	0.132156	Zygosaccharomyces	-0.708466	123-92-2	31276	FDB008132	banana and pear
1,2-BENZENEDICARBOXYLIC ACID, DIBUTYL ESTER	dibutyl phthalate	1.14971	0.427777	1	0.619205	0.720233	Zygosaccharomyces	-0.778624	84-74-2	3026	FDB011261	faint	commonly used plasticizer, used as an additive to adhesive or printing inks
4-(4-ACETYLPHENYL)-4-HYDROXY-2-METHYL-1-PENTENE		111.943	0.935785	1	0.0809515	0.102425	Zygosaccharomyces	-0.75492	NA	NA	NA	NA	NA
Benzaldehyde, 4-hydroxy-	P-Formilphenol	0.794312	0.18956	1	0.841758	0.962217	Zygosaccharomyces	-0.796836	123-08-0	126	FDB010504	almond, balsam, nutty, sweet, woody	occurs naturally combined in many glycosides
BENZENEACETIC ACID, 4-HYDROXY-3-METHOXY-	homovanillic acid	1.70121	0.869231	1	0.158242	0.195371	Zygosaccharomyces	-0.773422	306-08-1	NA	NA	NA	major catecholamide metabolite, detected in avocado, beer, olive
METHANE, DICHLORO-		0.174141	0.475754	1	0.572381	0.666939	Zygosaccharomyces	-0.82025	75-09-2	6344	FDB008159	sweet, pleasant smell	NA
OCTADECANE		38.8165	0.956401	1	0.0561202	0.072108	Zygosaccharomyces	-0.750763	593-45-3	11635	FDB011840	alkane	NA
OCTANOIC ACID	caprilic acid	0.393611	0.523626	1	0.523626	0.614027	Zygosaccharomyces	-0.732636	124-07-2	379	FDB003336	cheesy, rancid, sweat, vegetable	widespread in plant oils and in fruits
TETRADECANE		1.74617	0.949323	1	0.064638	0.0827316	Zygosaccharomyces	-0.829314	629-59-4	12389	FDB004731	alkane, mild, waxy	NA
